# Supplementary material for: The D-BEST Reference Model: A Flexible and Sustainable Support for the Digital Transformation of Small and Medium Enterprises
Source: Springer Nature journal article supplement (doi:10.1007/s40171-022-00307-y), 2022-06-04
Supplement: MOESM1 [file 23127458]

**Annex 1**

Figure A1. Ecosystem macro-class: Community building type of service

Figure A2 Ecosystem macro-class: DIH Innovation Development type of services

Figure A3 Ecosystem macro-class: DIH Innovation Development type of services

Figure A4 Technology macro-class: Ideas management and materialization type of services

Figure A5 Technology macro-class: Contract research type of services

Figure A6 Technology macro-class: Provision of infrastructure type of services

Figure A7 Technology macro-class: technical support on scale up type of services.

Figure A8 Technology macro-class: technical support on scale up type of services

Figure A9 Business macro-class: Incubation acceleration support type of services

Figure A10 Business macro-class: Access to finance type of services

Figure A11 Business macro-class: Business training and education type of services

Figure A12 Business macro-class: Project development type of services

Figure A13 Skills macro-class: Process & organizational maturity type of services

Figure A14 Skills macro-class: Human capabilities maturity type of services

Figure A15 Skills macro-class: Skills improvement type of services

Figure A16 Data macro-class: Data acquisition and sensing type of service

Figure A17 Data macro-class: Data processing & analysis type of services

Figure A18 Data macro-class: Decision-making type of services

Figure A19 Data macro-class: Physical-human action & interaction type of services

Figure A20 Data macro-class: Data sharing type of service
